# Supplementary material for: Use of Inhaled Corticosteroids and Risk of Acquiring Haemophilus influenzae in Patients with Chronic Obstructive Pulmonary Disease
Source: MDPI journal article supplement (doi:10.3390/jcm11123539), 2022-06-20
Supplement: s1 [file s1]

## SUPPLEMENTARY MATERIAL

**Table S1.** International classification of Diseases 10th revision (ICD-10) used for the definition of comorbidities in the study population.

| Comorbidity                                                              | ICD-10 code                                                                                                                   |
|--------------------------------------------------------------------------|-------------------------------------------------------------------------------------------------------------------------------|
| Immunodeficiency with predominantly antibody defects                     | D80                                                                                                                           |
| Combined immunodeficiencies                                              | D81                                                                                                                           |
| Immunodeficiency associated with other major defects                     | D82                                                                                                                           |
| Common variable immunodeficiency                                         | D83                                                                                                                           |
| Other immunodeficiencies                                                 | D84                                                                                                                           |
| Sarcoidosis                                                              | D86                                                                                                                           |
| Other disorders involving the immune mechanism, not elsewhere classified | D89                                                                                                                           |
| Inflammatory polyarthropathies                                           | M05-M14                                                                                                                       |
| Polyarteritis nodosa and related conditions                              | M30                                                                                                                           |
| Other necrotising vasculopathies                                         | M31                                                                                                                           |
| Systemic lupus erythematosus (SLE)                                       | M32                                                                                                                           |
| Dermatopolymyositis                                                      | M33                                                                                                                           |
| Systemic sclerosis [scleroderma]                                         | M34                                                                                                                           |
| Other systemic involvement of connective tissue                          | M35                                                                                                                           |
| Systemic disorders of connective tissue in diseases classified elsewhere | M36                                                                                                                           |
| Myositis                                                                 | M60                                                                                                                           |
| Myocardial infarction                                                    | I21-I23                                                                                                                       |
| Atrial fibrillation                                                      | I48                                                                                                                           |
| Heart failure                                                            | I110,I130,I132 I42, I50, J81                                                                                                  |
| Hypertension                                                             | I10-I15                                                                                                                       |
| Peripheral vascular disease                                              | I700-I174,I177,I179                                                                                                           |
| Cerebrovascular disease                                                  | I60-I64, G45, G46                                                                                                             |
| Diabetes Mellitus                                                        | E10-14                                                                                                                        |
| Renal failure                                                            | I120, I131, I132; E102, E112, E132, E142<br>N02-N08, N11, N14, N158; N159, N160, N162-<br>N164,N165 N168, N18, N19, N26, Z992 |
| Asthma                                                                   | J45                                                                                                                           |
| Bronchiectasis                                                           | J47                                                                                                                           |
| Depression                                                               | F32-34                                                                                                                        |

**Table S2.** Comorbidities at cohort entry in the study population.

| Comorbidities                       | All patients<br>(n=21,218) | <i>H. influenzae</i><br>Positive Patients<br>(n=801) | <i>H. influenzae</i><br>Negative Patients<br>(n=20,417) | P-value |
|-------------------------------------|----------------------------|------------------------------------------------------|---------------------------------------------------------|---------|
| Inflammatory Polyarthropathy        | 2,053 (9.6)                | 90 (11.2)                                            | 1,963 (9.6)                                             | 0.1     |
| Systemic connective tissue Disorder | 1,020 (4.8)                | 35 (4.4)                                             | 985 (4.64)                                              | 0.6     |
| Myocardial infarction               | 2,941 (13.9)               | 110 (13.7)                                           | 2,831 (13.9)                                            | 0.9     |
| Atrial fibrillation                 | 5,243 (24.7)               | 223 (27.8)                                           | 5,029 (24.6)                                            | 0.04    |
| Heart failure                       | 3,658 (17.4)               | 169 (21.1)                                           | 3,489 (17.1)                                            | 0.004   |
| Hypertension                        | 9,726 (45.8)               | 361 (45.1)                                           | 9,365 (45.9)                                            | 0.7     |
| Renal failure                       | 2,664 (12.6)               | 123 (15.4)                                           | 2,541 (12.6)                                            | 0.01    |
| Peripheral vascular disease         | 3,832 (18.1)               | 159 (19.9)                                           | 3673 (18.0)                                             | 0.2     |

|                           |              |            |              |        |
|---------------------------|--------------|------------|--------------|--------|
| Cerebrovascular disease   | 3,740 (17.6) | 136 (17.0) | 3,604 (17.7) | 0.6    |
| Diabetes mellitus, type 2 | 3,739 (17.6) | 157 (19.6) | 3,582 (17.5) | 0.1    |
| Asthma                    | 5,195 (24.5) | 270 (33.7) | 4,925 (24.1) | <.0001 |
| Bronchiectasis            | 637 (3.0)    | 67 (8.4)   | 570 (2.8)    | <.0001 |
| Depression                | 1,911 (9.0)  | 79 (9.9)   | 1832 (9.0)   | 0.4    |
| Data is reported as n (%) |              |            |              |        |

**Table S3.** Months prior to cohort entry in the study population.

|                                                                | All patients   | <i>H. influenzae</i><br>Positive Patients | <i>H. influenzae</i><br>Negative Patients | P-value |
|----------------------------------------------------------------|----------------|-------------------------------------------|-------------------------------------------|---------|
| Number of patients                                             | 21,218 (100)   | 801 (3.8)                                 | 20,417 (96.2)                             |         |
| Oral corticosteroids                                           |                |                                           |                                           | <.0001  |
| No use                                                         | 13,305 (62.7)  | 341 (42.6)                                | 12,964 (63.5)                             |         |
| Low dose                                                       | 3,947 (18.6)   | 190 (23.7)                                | 3,757 (18.4)                              |         |
| High dose                                                      | 3,696 (18.1)   | 270 (33.7)                                | 3,696 (18.1)                              |         |
| Accumulated dose (mg), median (IQR)                            | 750 (250-2000) | 750 (500-2500)                            | 625 (250-2000)                            | <.0001  |
| Long-acting beta2-agonist or long-acting muscarinic-antagonist | 14,203 (66.9)  | 658 (82.2)                                | 13,545 (66.3)                             | <.0001  |
| Theophylline                                                   | 696 (3.9)      | 44 (5.5)                                  | 652 (3.2)                                 | .0008   |
| Antibiotics <sup>b</sup>                                       | 14,341 (67.6)  | 654 (81.7)                                | 13,687 (67.0)                             | <.0001  |

Data is reported as n (%) or median (IQR), unless indicated otherwise.<sup>a</sup> Low dose < 750 mg; high dose ≥ 750 mg.<sup>b</sup> Any antibiotic drug.

**Table S4.** Characteristics at cohort entry and according to ICS exposure in 13,324 propensity matched patients with COPD.

|                                            | All patients     | Patients with high or moderate ICS exposure | Patients with low or no ICS exposure | P-value |
|--------------------------------------------|------------------|---------------------------------------------|--------------------------------------|---------|
| Number of patients                         | 13,324 (100)     | 6,662 (50)                                  | 6,662 (50)                           |         |
| Demographics                               |                  |                                             |                                      |         |
| Age (year), median (IQR)                   | 70.2 (62.9-77.7) | 70.1 (63.0-77.5)                            | 70.4 (62.7-77.9)                     | 0.6     |
| Age <62                                    | 3,019 (22.7)     | 1,483 (22.3)                                | 1,536 (23.1)                         | 0.5     |
| Age 62-69                                  | 3,508 (26.3)     | 1,823 (27.4)                                | 1,685 (25.3)                         |         |
| Age 70-77                                  | 3,598 (27.0)     | 1,786 (26.8)                                | 1,812 (27.2)                         |         |
| Age >77                                    | 3,199 (24.0)     | 1,570 (23.6)                                | 1,629 (24.5)                         |         |
| Male                                       | 5,999 (45.0)     | 2,986 (44.8)                                | 3,013 (45.2)                         | 0.6     |
| BMI, median (IQR)                          | 25 (21-29)       | 25 (21-29)                                  | 25 (21-29)                           | .02     |
| BMI-class                                  |                  |                                             |                                      | 0.2     |
| <18.5                                      | 1,120 (8.4)      | 601 (9.0)                                   | 519 (7.8)                            |         |
| 18.5-24.9                                  | 5,922 (44.5)     | 2,935 (44.1)                                | 2,987 (44.8)                         |         |
| 25-29.9                                    | 3,632 (27.3)     | 1,822 (27.4)                                | 1,810 (27.2)                         |         |
| 30 -34.9                                   | 1,716 (12.9)     | 841 (12.6)                                  | 875 (13.1)                           |         |
| >35                                        | 934 (7.0)        | 463 (7.0)                                   | 471 (7.1)                            |         |
| Pulmonary parameters                       |                  |                                             |                                      |         |
| MRC, median (IQR)                          | 3 (2-4)          | 3 (2-4)                                     | 3 (2-4)                              | <.0001  |
| FEV <sub>1</sub> % predicted, median (IQR) | 48 (36-61)       | 48 (36-60)                                  | 48 (36-62)                           | <.007   |

|                                                                                        |              |              |              |        |
|----------------------------------------------------------------------------------------|--------------|--------------|--------------|--------|
| FEV <sub>1</sub> % predicted,<br>severity of obstruction                               |              |              |              | .03    |
| ≥ 80                                                                                   | 517 (3.9)    | 288 (4.3)    | 229 (3.4)    |        |
| 50-79                                                                                  | 6,332 (47.5) | 3,114 (46.7) | 3,218 (48.3) |        |
| 30-49                                                                                  | 4,804 (36.1) | 2,431 (36.5) | 2,373 (35.6) |        |
| <30                                                                                    | 1,671 (12.5) | 829 (12.4)   | 842 (12.6)   |        |
| Active smoking status at<br>study entry                                                | 4,416 (33.1) | 2,180 (32.7) | 2,236 (33.6) | 0.3    |
| Hospital-requiring COPD<br>exacerbation 12 months<br>prior to study entry              |              |              |              |        |
| 0                                                                                      | 6,308 (47.3) | 3,043 (45.7) | 3,265 (49.0) |        |
| 1                                                                                      | 1,890 (14.2) | 928 (13.9)   | 962 (14.4)   |        |
| ≥2                                                                                     | 5,126 (38.5) | 2,691 (40.4) | 2,435 (36.6) |        |
| All-cause hospitalisation<br>12 months prior to study<br>entry (number of<br>patients) | 8,684 (65.2) | 4,262 (64.0) | 4,422 (66.4) |        |
| Comorbidity                                                                            |              |              |              |        |
| Inflammatory<br>Polyarthropathy                                                        | 1,318 (9.9)  | 624 (9.4)    | 694 (10.4)   |        |
| Systemic connective<br>tissue disorder                                                 | 656 (4.9)    | 278 (4.2)    | 378 (5.7)    |        |
| Myocardial<br>infarction                                                               | 1,863 (14.0) | 900 (13.5)   | 963 (14.5)   |        |
| Atrial fibrillation                                                                    | 3,419 (25.7) | 1,717 (25.8) | 1,702 (25.6) |        |
| Heart failure                                                                          | 2,394 (18.0) | 1,157 (17.4) | 1,237 (18.6) |        |
| Hypertension                                                                           | 6,267 (47.0) | 3,109 (46.7) | 3,158 (47.4) |        |
| Renal failure                                                                          | 1,712 (12.9) | 801 (46.8)   | 911 (13.7)   |        |
| Peripheral vascular<br>disease                                                         | 2,456 (18.4) | 1,191 (17.9) | 1,265 (19.0) |        |
| Cerebrovascular<br>disease                                                             | 2,429 (18.2) | 1151 (17.3)  | 1,278 (19.2) |        |
| Diabetes mellitus,<br>type<br>2                                                        | 2,430 (18.2) | 1,206 (18.1) | 1224 (18.4)  |        |
| Asthma                                                                                 | 3,443 (25.8) | 2,210 (33.2) | 1,233 (18.5) |        |
| Bronchiectasis                                                                         | 411 (3.1)    | 246 (3.4)    | 165 (2.5)    |        |
| Oral corticosteroids <sup>a</sup>                                                      |              |              |              | 0.5    |
| No use                                                                                 | 8,054 (60.5) | 3,968 (59.6) | 4,086 (61.3) |        |
| Low dose                                                                               | 2,927 (22.0) | 1,554 (23.3) | 1,373 (20.6) |        |
| High dose                                                                              | 2,343 (17.6) | 1,140 (17.1) | 1,203 (18.1) |        |
| Other medicine                                                                         |              |              |              |        |
| Theophylline                                                                           | 419 (3.1)    | 299 (4.5)    | 120 (1.8)    | <.0001 |
| LABA or LAMA                                                                           | 9,469 (71.1) | 5,414 (81.3) | 4,055 (60.9) | <.0001 |
| Antibiotics <sup>b</sup>                                                               | 9,197 (69.0) | 4,828 (72.5) | 4,369 (65.6) | <.0001 |
